# Supplementary material
Source: publisher figshare collection journal article supplement (https://tandf.figshare.com/ndownloader/files/17661557)
Supplement: Supplementary file 1 [file 17661557]

| UTM Coordinates | | Elevation (m a.s.l.) | Place name | Municipality |
| --- | --- | --- | --- | --- |
| X | Y |
| 395503 | 4647281 | 1151 | above Aschi, near graveyard | Ortona dei Marsi |
| 373889 | 4658427 | 990 | near S. Onofrio | Avezzano |
| 389915 | 4652989 | 820 | above Pescina, near Ex Tiro a Segno | Pescina |
| 392960 | 4648993 | 1142 | Gorga, near Monte Tricella | Ortona dei Marsi |
| 388073 | 4659602 | 981 | near Fontana Vallone | Collarmele |
| 372270 | 4661577 | 984 | Castelnuovo, near Pie' delle Macchie | Avezzano |
| 372236 | 4661624 | 986 | Castelnuovo, near Pie' delle Macchie | Avezzano |
| 387112 | 4659946 | 1087 | Fontana Cituro | Collarmele |
| 395398 | 4648231 | 1056 | below Aschi, near Verrella | Ortona dei Marsi |
| 389760 | 4653624 | 888 | above Pescina, near Monumento Alpini | Pescina |
| 390181 | 4651964 | 940 | near Colle di Mezzo | Pescina |
| 390360 | 4653201 | 938 | near Rocca Vecchia | Pescina |
| 373024 | 4663414 | 1160 | Capo La Maina | Massa d’Albe |
| 392950 | 4649466 | 1165 | Le Stalle | Ortona dei Marsi |
| 393643 | 4648565 | 1186 | Valle Fredda | Ortona dei Marsi |
| 393019 | 4649178 | 1148 | Gorga, near Monte Tricella | Ortona dei Marsi |
| 393553 | 4648419 | 1211 | Valle Fredda | Ortona dei Marsi |

**Tab. S1** – Location data of the collected specimens identified as *F. valesiaca* subsp. *valesiaca*. UTM coordinates are referred to WGS84, fuse 33. Place names are obtained from IGM 1:25,000 maps.


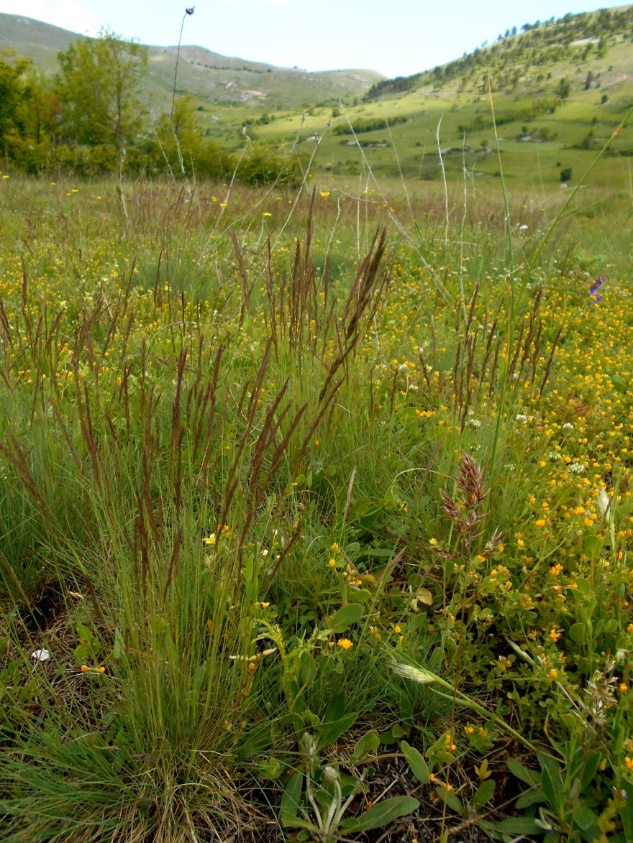


**Fig. S1 -** Habitus of *F. valesiaca* in an old-field grassland community near Mt. Tricella, Ortona dei Marsi (20 May 2018).


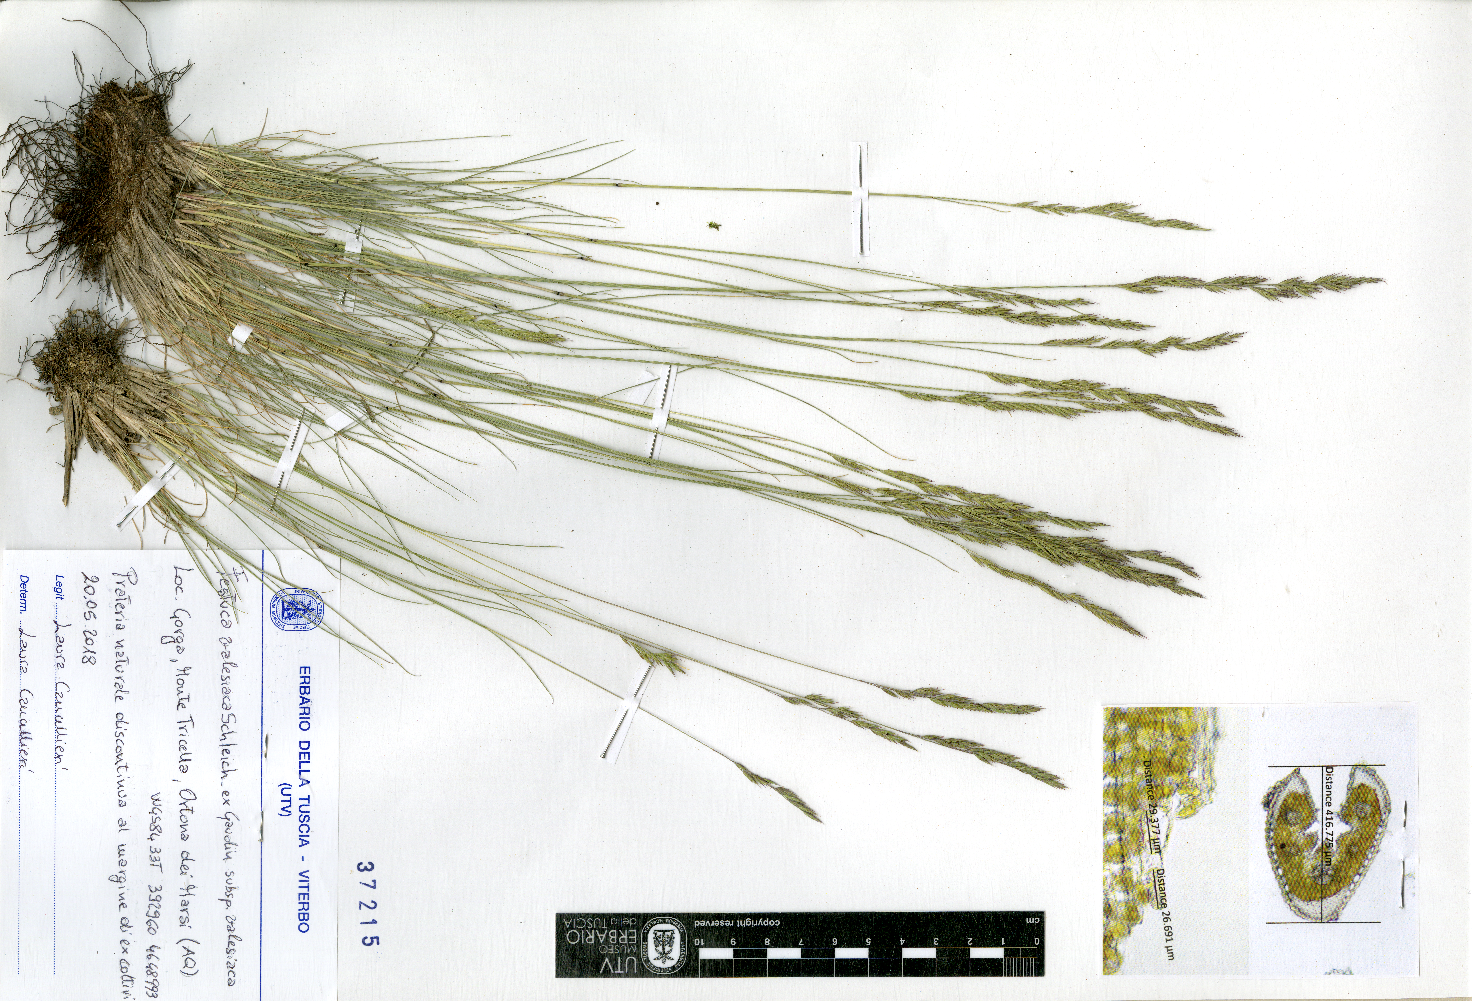


**Fig. S2 -** Herbarium voucher of *F. valesiaca* from the Central Apennines, stored in UTV. Specimen collected near Mt. Tricella, Ortona dei Marsi (20 May 2018)
